# Supplementary material for: Microporous organic polymers based on tetraethynyl building blocks with N-functionalized pore surfaces: synthesis, porosity and carbon dioxide sorption
Source: Royal Society of Chemistry journal article supplement (doi:10.1039/c6ra20765k), 2016-01-01
Supplement: c6ra20765k1.pdf [file c6ra20765k1.pdf]

***Supporting Information for***

**Microporous organic polymers based on tetraethynyl building blocks  
with N-functionalized pore surface: synthesis, porosity and carbon  
dioxide sorption**

Hongjiang Zhang,<sup>a</sup> Chong Zhang,<sup>b</sup> Xunchang Wang,<sup>a</sup> Zexiong Qiu,<sup>c</sup> Xinmiao Liang,<sup>d</sup>

Bing Chen,<sup>d</sup> Jiawei Xu,<sup>a</sup> Jia-Xing Jiang,<sup>\*b</sup> Yuda Li,<sup>a</sup> Hui Li<sup>a</sup> and Feng Wang<sup>\*a</sup>

<sup>a</sup>Key Laboratory for Green Chemical Process of Ministry of Education, School of Chemical Engineering and Pharmacy, Wuhan Institute of Technology, Wuhan 430073, P. R. China

<sup>b</sup>School of Materials Science and Engineering, Shaanxi Normal University, Xi'an 710062, P. R. China

<sup>c</sup>School of Materials Science and Engineering, Wuhan University of Technology, Wuhan 430070, P. R. China

<sup>d</sup>State key Laboratory of Magnetic Resonance and Atomic and Molecular Physics, Wuhan Institute of Physics and Mathematics, Chinese Academy of Science, Wuhan 430071, P. R. China

*E-mail address:* psfwang@wit.edu.cn (F. Wang), jiaxing@snnu.edu.cn (J.-X. Jiang).

## Table of Contents

**Figure S1.** FT-IR spectra of the polymer networks.

**Figure S2.** CP/MAS  $^{13}\text{C}$  NMR spectra of polymer networks and the corresponding peak assignments. The spectra of polymers were recorded at a magic angle spinning rate of 10.0 kHz.

**Figure S3.** Thermogravimetric analysis of the polymer networks under nitrogen atmosphere with a heating rate of 10  $^{\circ}\text{C}$  /min.

**Figure S4.** Powder X-ray spectra of the polymer networks.

**Figure S5.**  $\text{CO}_2$  adsorption isotherms collected at 283 K up to 1.13 bar for the polymer networks.

**Figure S6.** Initial gas uptake slopes of the TEPM-TPA (a), TEPS-TPA (b) TEPM-Azo (c) and TEPS-Azo (d) networks for  $\text{CO}_2/\text{CH}_4$  and  $\text{CO}_2/\text{N}_2$  at 273 K.

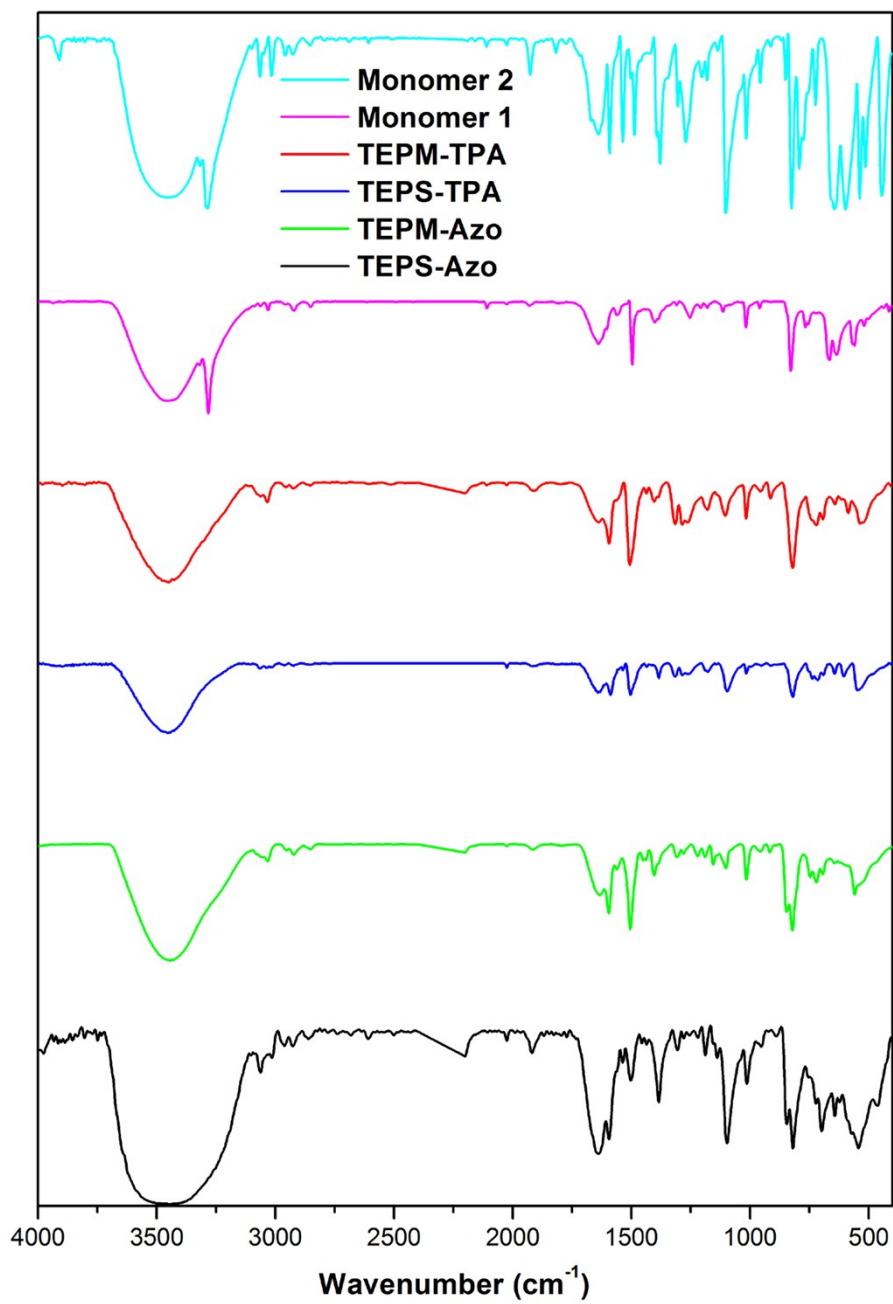

**Figure S1.** FT-IR spectra of the polymer networks.

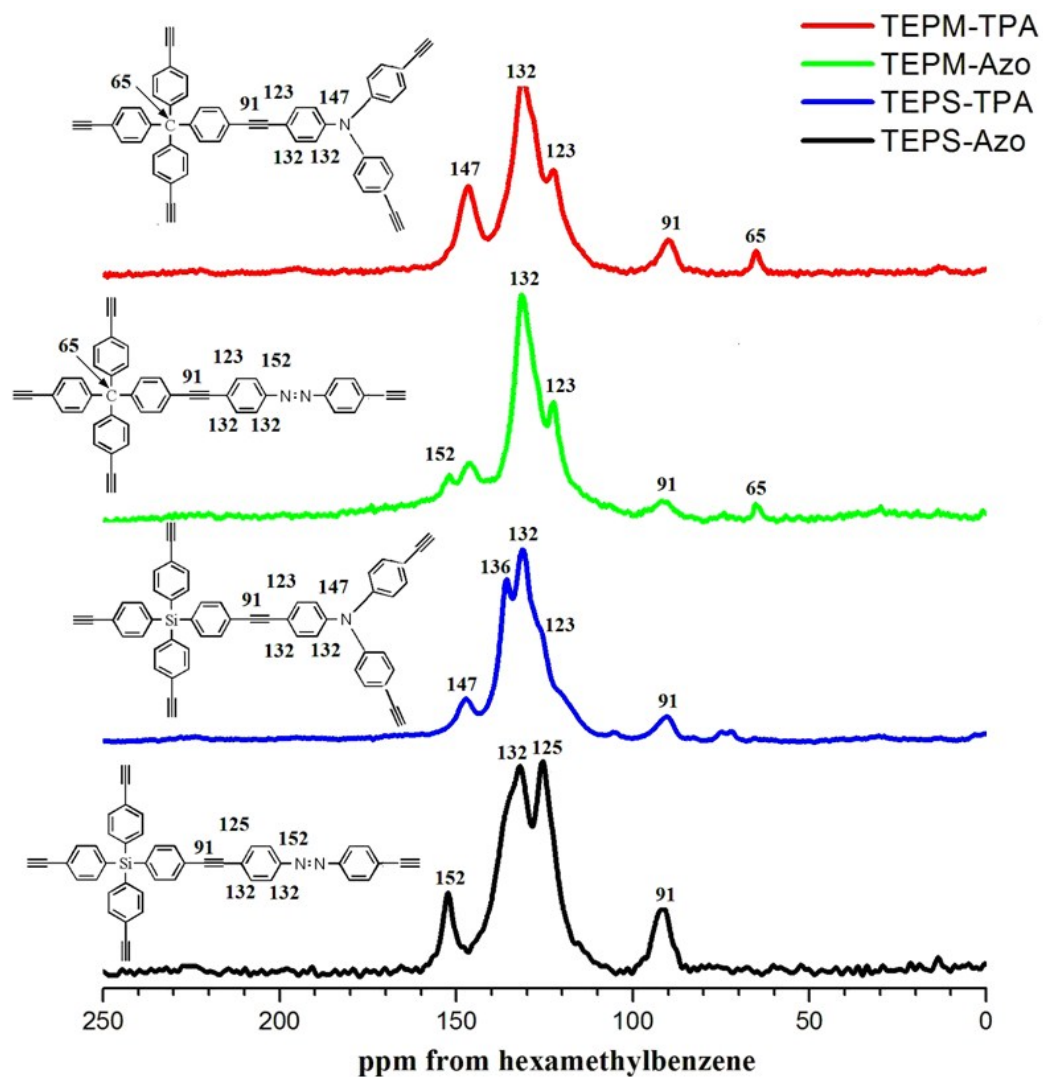

**Figure S2.** CP/MAS  $^{13}\text{C}$  NMR spectra of polymer networks and the corresponding peak assignments. The spectra of polymers were recorded at a magic angle spinning rate of 10.0 kHz.

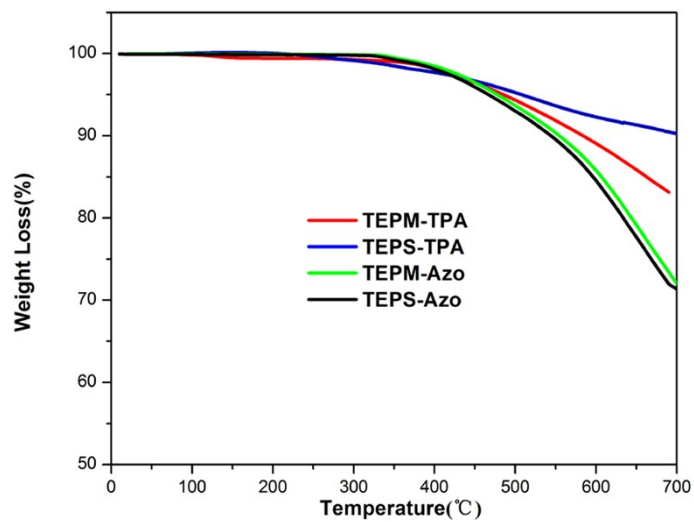

**Figure S3.** Thermogravimetric analysis of the polymer networks under a nitrogen atmosphere with a heating rate of 10 °C/min.

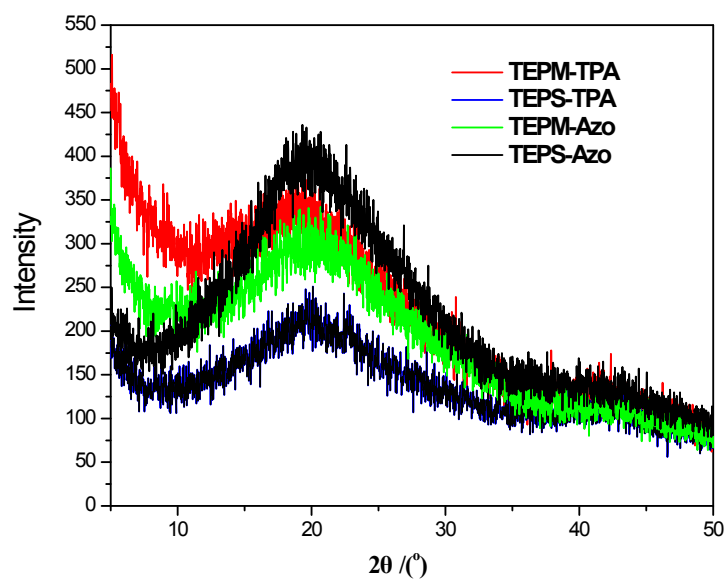

**Figure S4.** Powder X-ray spectra of the polymer networks.

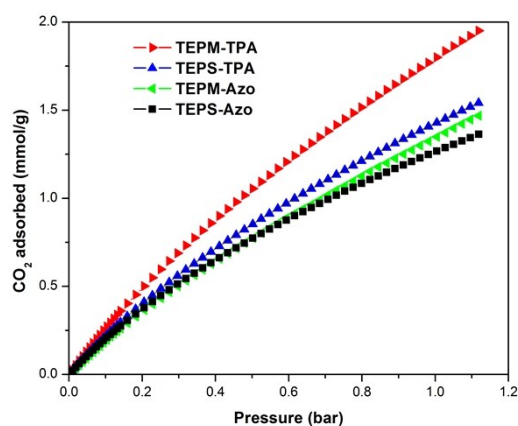

**Figure S5.** CO<sub>2</sub> adsorption isotherms collected at 283 K up to 1.13 bar for the polymer networks.

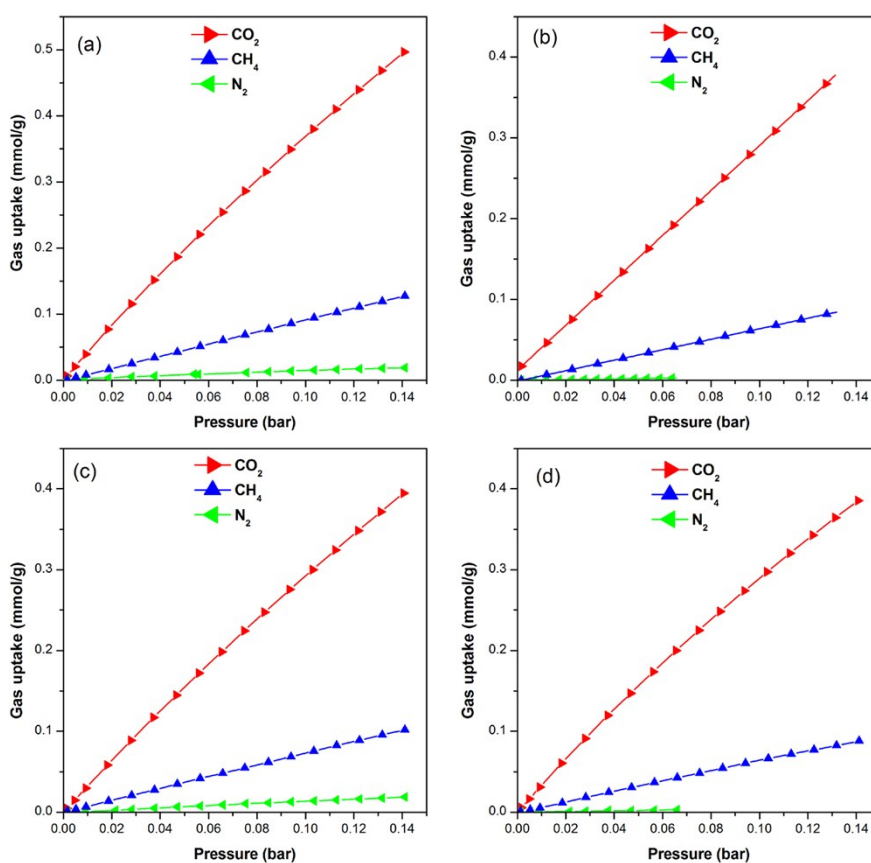

**Figure S6.** Initial gas uptake slopes of the TEPM-TPA (a), TEPS-TPA (b), TEPM-Azo (c) and TEPS-Azo (d) networks for CO<sub>2</sub>/CH<sub>4</sub> and CO<sub>2</sub>/N<sub>2</sub> at 273 K.
